# Supplementary material for: Comparison of patient adaptation with in-office aligners with two different levels of the gingival margin
Source: Research Square preprint supplement (doi:10.21203/rs.3.rs-6784996/v1), 2025-06-10
Supplement: Supplementary file 1 [file 4522e92ccd07c10db58073b9.docx]

**Table 1.** Comparison of responses to the questionnaire evaluating the items for satisfaction use of clear aligners (Wilcoxon Test).

| **Question** | **0mm** | | **2mm** | | **P** |
| --- | --- | --- | --- | --- | --- |
| **Median (Mean)** | **i.r.  (s.d.)** | **Median**  **(Mean)** | **i.r.  (s.d.)** |
| 1 – Adaptation | 10.00  (9.35) | 1.00  (0.88) | 10.00  (9.09) | 2.00  (1.41) | 0.374 |
| 2 – Speech | 10.00  (9.22) | 1.00  (1.04) | 9.00  (9.22) | 1.00  (0.95) | 1.000 |
| 3 – Swallowing | 10.00  (9.22) | 1.00  (0.99) | 10.00  (9.26) | 2.00  (1.01) | 0.906 |
| 4 – Comfort | 10.00  (9.17) | 2.00  (1.11) | 9.00  (9.00) | 2.00  (1.17) | 0.456 |
| 5 – Cleaning | 10.00  (9.22) | 2.00  (1.24) | 10.00  (9.26) | 1.00  (1.14) | 0.779 |
| 6 – Aesthetics | 10.00  (9.56) | 1.00  (0.84) | 10.00  (9.48) | 1.00  (1.08) | 0.584 |
| 7 – Durability | 10.00  (9.17) | 1.00  (1.33) | 10.00  (9.30) | 2.00  (1.06) | 0.554 |
| 8 – Fitting | 10.00  (9.43) | 1.00  (0.79) | 10.00  (9.48) | 1.00  (1.08) | 0.745 |
| 9 – Retention | 10.00  (9.22) | 1.00  (0.99) | 10.00  (9.52) | 1.00  (0.79) | 0.529 |
