# Supplementary material for: Comparison of patient adaptation with in-office aligners with two different levels of the gingival margin
Source: Research Square preprint supplement (doi:10.21203/rs.3.rs-6784996/v1), 2025-06-10
Supplement: Supplementary file 2 [file 5786b4d0d3a799535a6c45e9.docx]

**Table 3.** Comparison in the gingival index (G.I.) with two different gingival margins of clear aligners - 0mm and 1mm (dependent t-test).

|  | **0 mm** | | **2mm** | | **p** |
| --- | --- | --- | --- | --- | --- |
|  | **Mean** | **s.d.** | **Mean** | **s.d.** |
| **GI** | -0.42 | 1.84 | -0.10 | 1.43 | 0.549 |
