# Supplementary material for: Comparison of patient adaptation with in-office aligners with two different levels of the gingival margin
Source: Research Square preprint supplement (doi:10.21203/rs.3.rs-6784996/v1), 2025-06-10
Supplement: Supplementary file 3 [file a8f3930778decad88d766420.docx]

**Table 2.** Patients' preference between the two different gingival margin levels.

|  | **0 mm** | **2mm** | **p** |
| --- | --- | --- | --- |
| **Patients preference (%)** | 69.57% | 30.43% | **0.008*** |

*Statistically significant for p<0.05
